# Supplementary material for: Selective enrichment of mycobacterial proteins from infected host macrophages
Source: PubMed Central journal article supplement (PMC4548221; doi:10.1038/srep13430), 2015-08-25
Supplement: srep13430-s1.pdf [file srep13430-s1.pdf]

## **Supplementary information**

### **Selective enrichment of mycobacterial proteins from infected host macrophages**

Ajit G. Chande<sup>1,2#</sup>, Zaved Siddiqui<sup>1</sup>, Mukul Kumar Midha<sup>3</sup>, Varsha Sirohi<sup>1</sup>,  
Srikanth Ravichandran<sup>1</sup> and Kanury V. S. Rao<sup>1,3</sup>

<sup>1</sup>Immunology Group, International Centre for Genetic Engineering and Biotechnology,  
New Delhi-India

<sup>3</sup>Drug Discovery Research Centre, Translational Health Science and Technology Institute, Gurgaon,  
Haryana-India

# **Correspondence:** [ajit.chande@gmail.com](mailto:ajit.chande@gmail.com)

<sup>2</sup> **Current address:** Centre for Integrative Biology-University of Trento, Italy.

# Supplementary Fig. 1

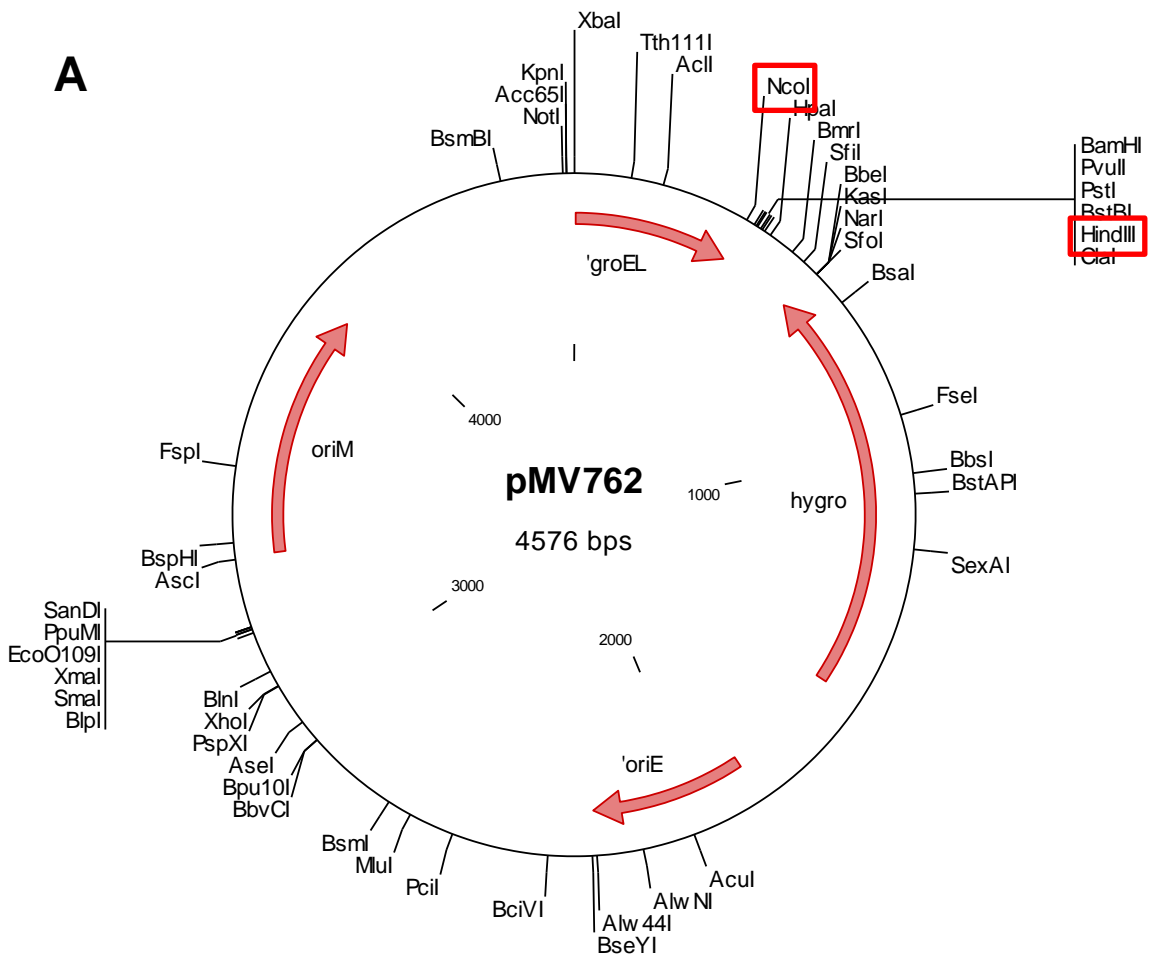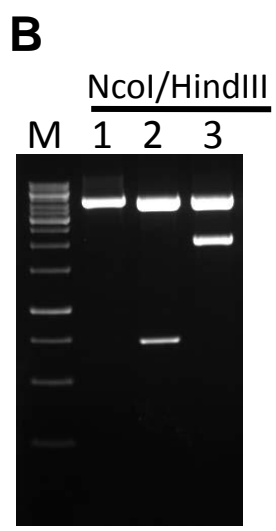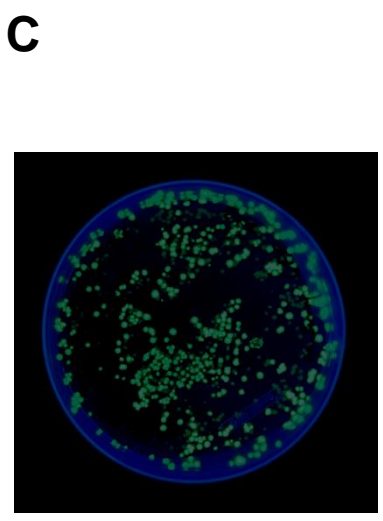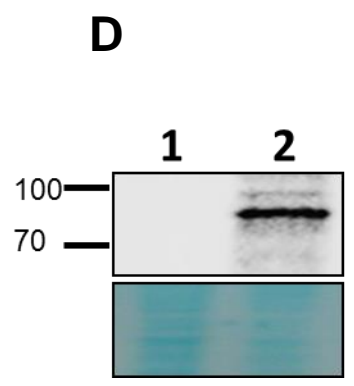

1: pMV762  
 2: pMV-GFP  
 3: pMV-Met-HA  
 M: 1kb DNA marker

**Suppl. Fig-1. Generation of mycobacterial constructs for expression of the target protein and metabolic labeling:** (A) pMV762 vector map showing the NcoI/HindIII sites downstream to the GroEL promoter; (B) The GFP and HA-tagged Myco-Met encoding nucleotides were cloned in pMV762 at NcoI/HindIII sites. The gel picture shows the fragment release upon digestion with the said enzymes; (C) GroEL promoter driven GFP expression in *M. smeg* colonies: pMV762-GFP vector transformed colonies were selected on hygromycin and checked for the expression of GFP under a UV trans-illuminator; (D) HA tagged Myco-MetRS expression from the lysates of empty vector transformed (1) and pMV-Myco-MetRS-transformed (2) *M. smeg* strain was assessed by immunoblotting using mouse monoclonal anti-HA antibody (1:4000 dilution). The signal was detected using IR-labeled anti-mouse secondary antibody. Stained membrane served as a loading control.

## Supplementary Fig. 2

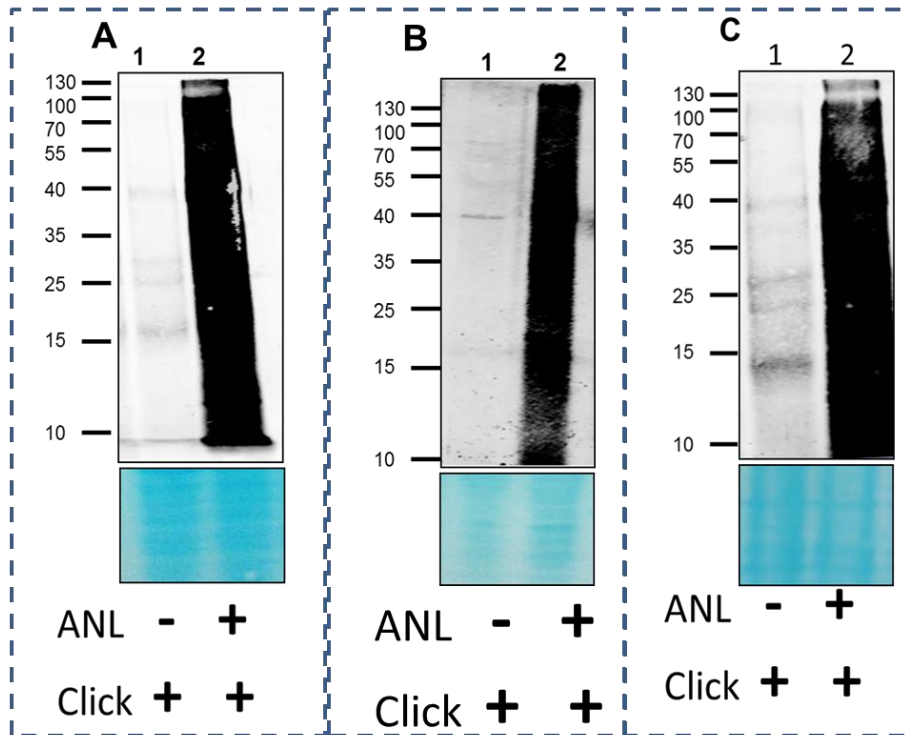

**Suppl. Fig-2. Metabolic incorporation of ANL into proteins of H37Rv (A), H37Ra (B) and BND433 (C):** Cells were grown in the presence (+) or absence (-) of ANL, and all the cell lysates were treated with biotin-alkyne for covalent incorporation using click reaction. Streptavidin-IR800CW dye signal was captured using Odyssey infra-red scanning system. Stained membrane (bottom) served as a loading control. The signal indicates streptavidin interaction with the covalently captured biotin-alkyne to the ANL incorporated into cellular proteins.

# Supplementary Fig. 3

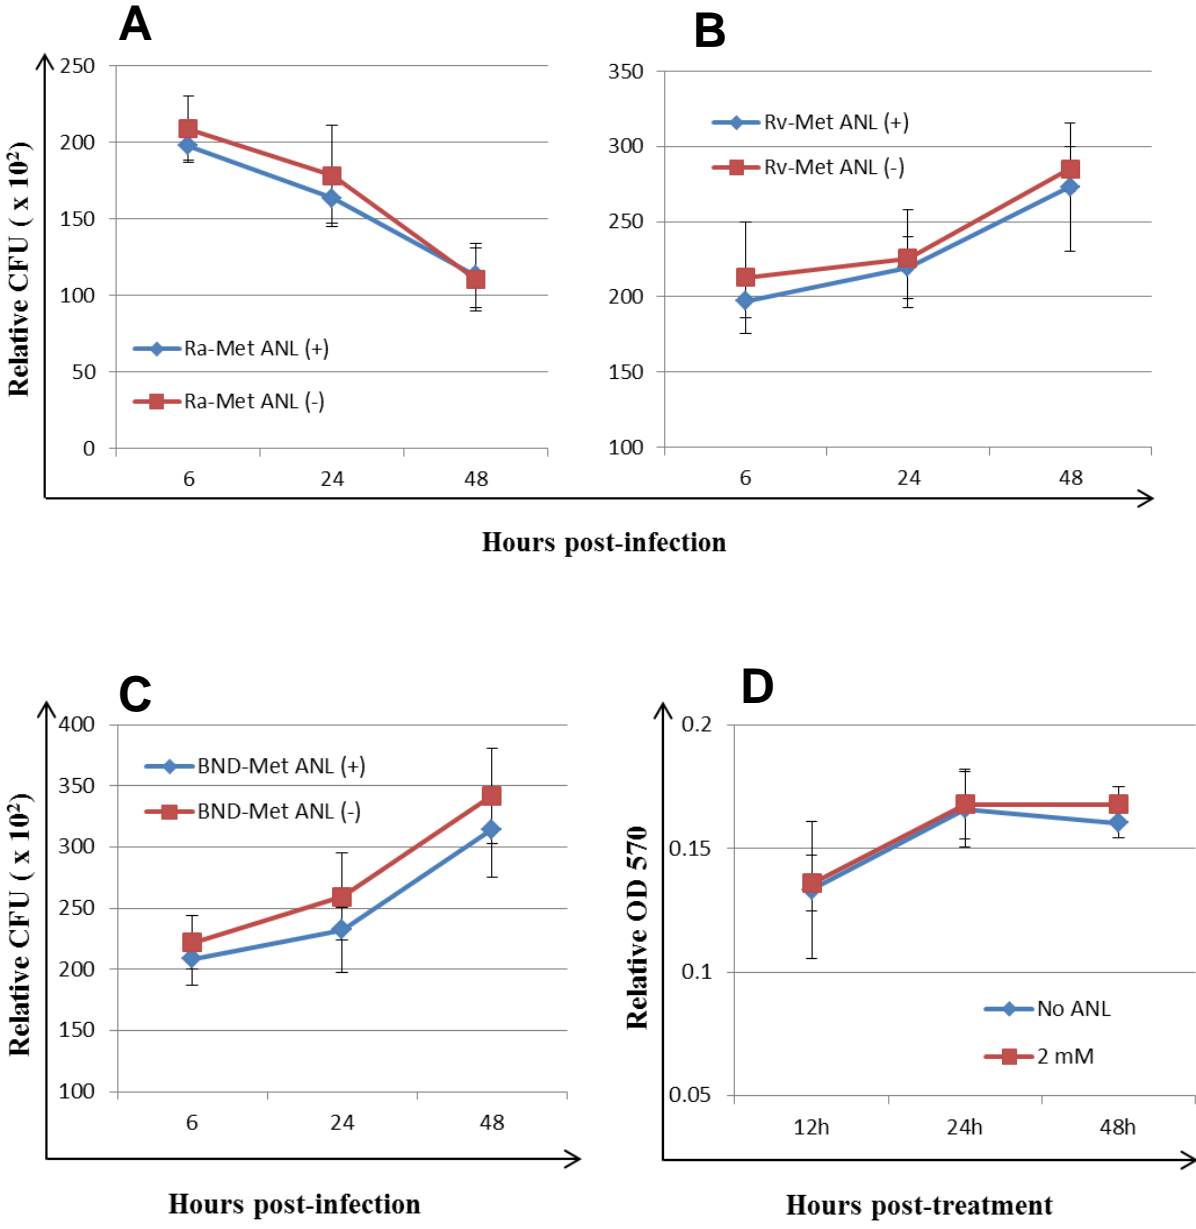

**Suppl. Fig-3. ANL toxicity:** growth properties of the individual isolates (A-C) and the THP1 host macrophages (D) in presence or absence of ANL. For the mycobacterial isolates CFU values, expressed as a function of viable mycobacterial cells obtained at the indicated times after infection, are shown. Whereas the effect of ANL on the host was examined by MTT assay. (n=3, ±SD)

# Supplementary Fig. 4

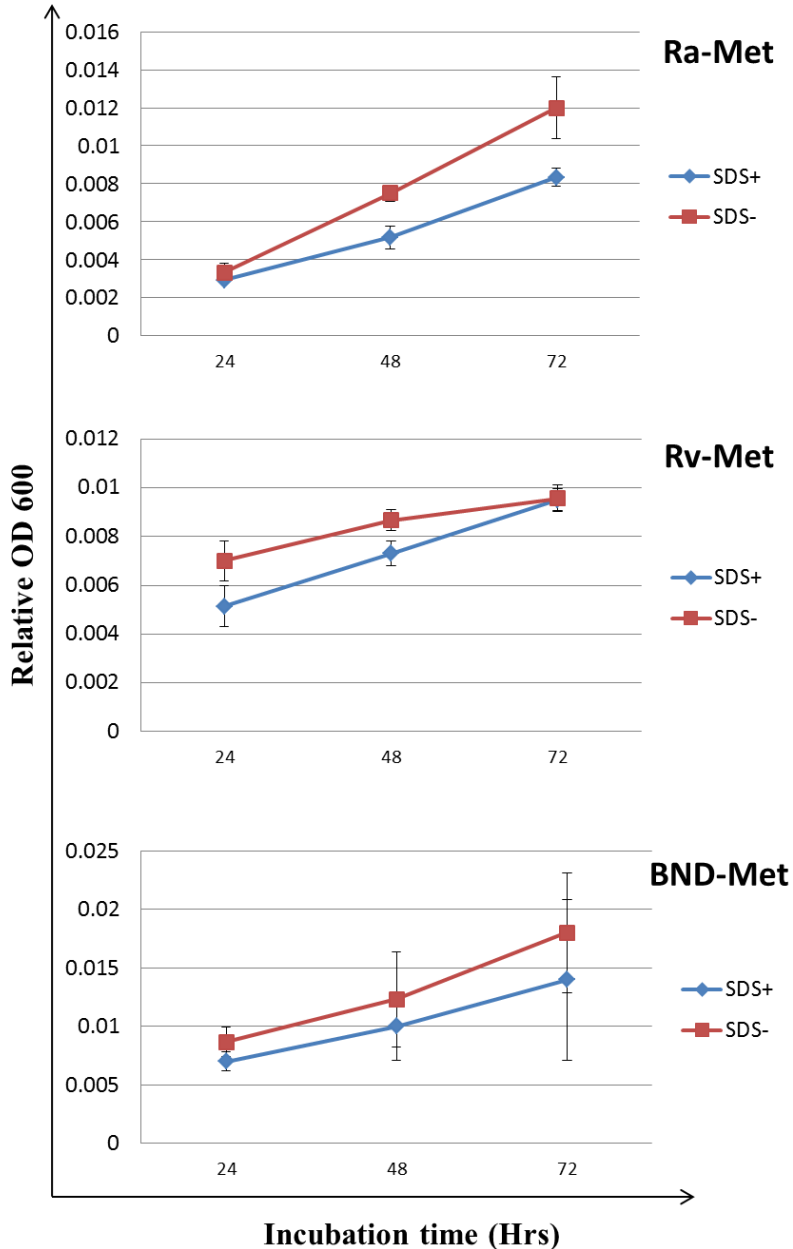

**Suppl. Fig-4. Extracellular growth properties of the individual isolates:** Mycobacteria were recovered from the infected host by lysis with 1% SDS followed by centrifugation. Recovered bacteria were washed with PBS three times and then inoculated in the middlebrook 7H9 medium. The optical density (OD;600) obtained at the indicated times is shown. Untreated 7H9 broth cultures (SDS-) served as the respective controls for each of the strain under study. (n=3, ±SD)

# Supplementary Fig. 5

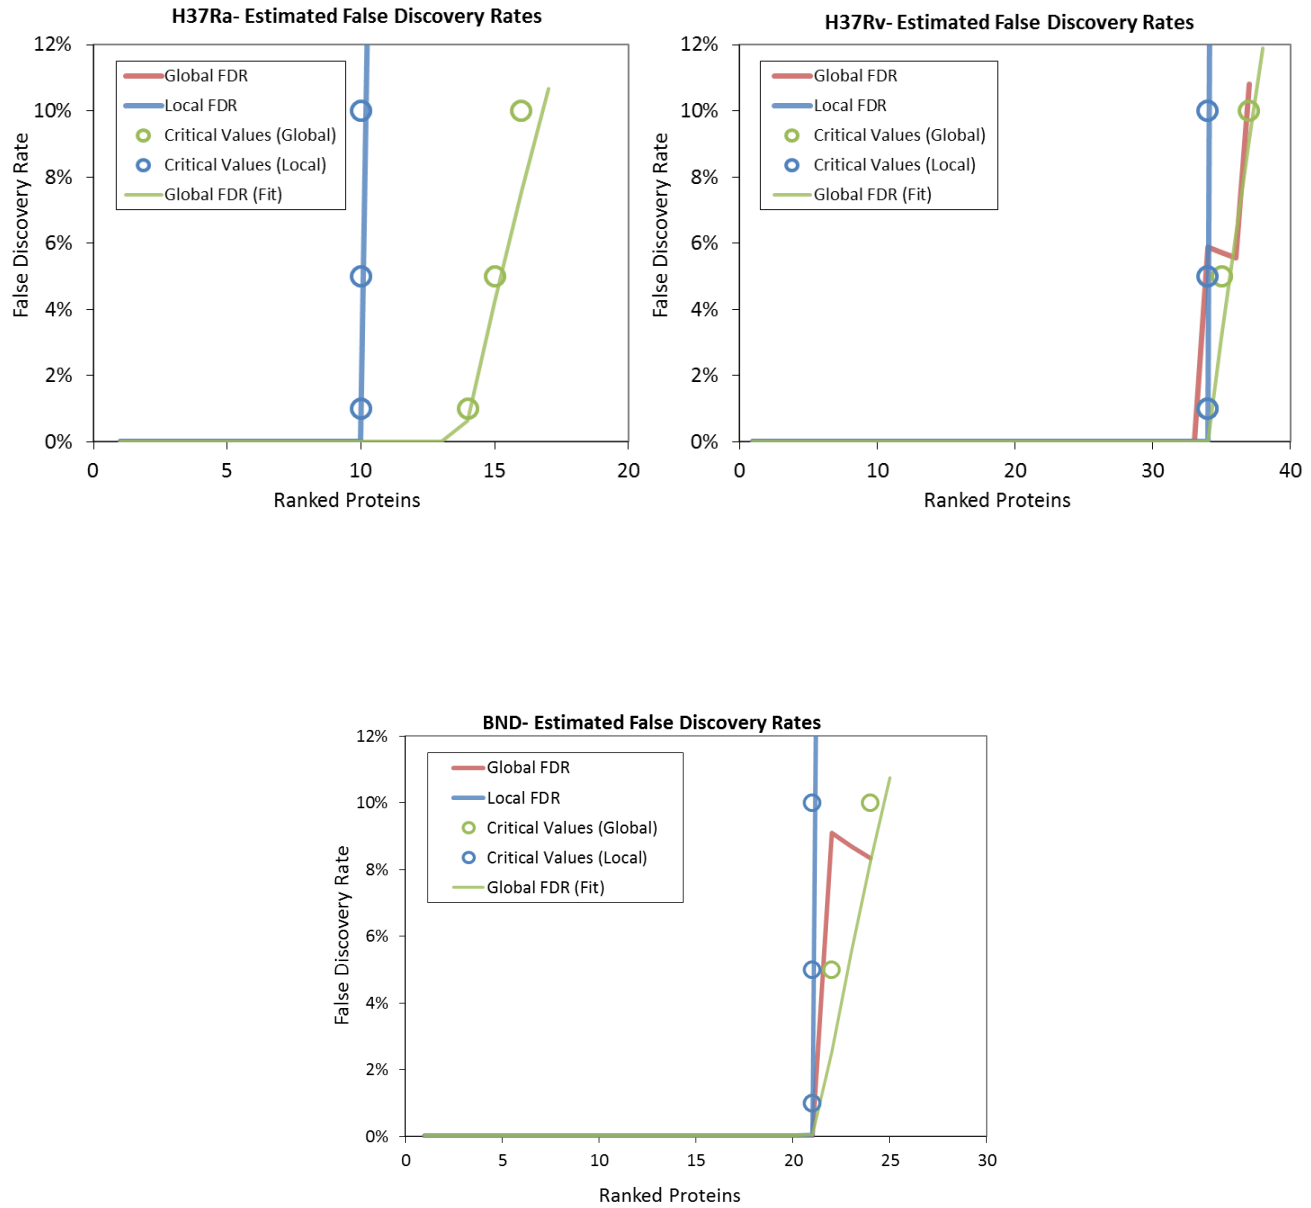

**Suppl. Fig-5. Measured False Discovery Rates for MTb Strains:** Threshold of 5% accepted Global False discovery rate (G-FDR-fit) proteins criteria were selected for identification of Mtb secreted proteins.

## Sequence of Myco-MetRS:

ATGACCCAGGTGGCCAAGAAAATCCTGGTGACCTGCGCCAACCCGTACGCC  
AACGGCTCGATCCACCTGGGCCACATGCTGGAACACATCCAGGCCGACGTG  
TGGGTGCGCTACCAGCGCATGCGTGGCCACGAGGTGAACTTCATCTGTGCC  
GACGACGCCACGGCACCCCGATCATGCTGAAGGCCAGCAGCTGGGCAT  
CACCCCGAGCAGATGATCGGCGAGATGTCGCAAGAGCACCAGACCGACT  
TCGCCGGTTTCAACATCTCGTACGACAACCTACCCTCGACCCACTCGGAGG  
AAAACCGCCAGCTGTCGGAGCTGATCTACTCGCGCTTGAAAGAGAACGGC  
TTCATCAAGAACCGCACCATCTCGCAGCTGTACGACCCGGAAAAGGGCATG  
TTCCTGCCGGACCGCTTCGTGAAGGGCACGTGCCCGAAGTGCAAGTCGCC  
GGACCAGTACGGCGACAACCTGCGAGGTGTGCGGTGCCACCTACTCGCCGA  
CCGAGCTGATCGAGCCGAAGTCGGTGGTGTGCGGTGCCACCCCGGTGATG  
CGCGACTCGGAGCACTTCTTCTTCGACCTGCCGTGTTCTCGGAGATGCTG  
CAGGCCTGGACCCGCTCGGGTGCCCTGCAAGAACAGGTGGCCAACAAGAT  
GCAAGAGTGGTTCGAGTCGGGCTTGCAGCAGTGGGACATCTCGCGTGATG  
CCCCGTACTTCGGCTTCGAGATCCCGAACGCCCGGGTAAGTACTTCTACGT  
GTGGCTGGATGCCCCGATCGGCCTGATGGGCTCGTTCAAGAACCTGTGCGA  
CAAGCGTGGCGACTCGGTGTGTTTCGACGAGTACTGGAAGAAGGACTCGA  
CCGCCGAGCTGTACCACTTCATCGGCAAGGATATCGTGTACTTCTGTGCT  
GTTCTGGCCGGCCATGCTGGAAGGCTCGAACTTCCGCAAGCCGTCGAACCT  
GTTTCGTGCACGGCTACGTGACCGTGAACGGTGCCAAGATGTGCAAGTCGC  
GTGGCACCTTCATCAAGGCCTCGACCTGGCTGAACCACTTCGACGCCGACT  
CGCTGCGCTACTACTACACCGCCAAGCTGTGTCGTCGCGCATCGACGACATCG  
ACCTGAACTTGGAGGACTTCGTGCAGCGCGTGAACGCCGACATCGTGAAC  
AAGGTGGTGAACCTGGCCTCGCGCAACGCCGGTTTCATCAACAAGCGCTTC  
GACGGCGTGTGGCCTCGGAATTGGCCGACCCGCAGCTGTACAAGACCTTC  
ACCGATGCCGCCGAGGTGATCGGCGAGGCCTGGGAGTCGCGTGAGTTCGG  
TAAGGCCGTGCGCGAGATCATGGCCCTGGCCGATCTGGCCAACCGCTACGT  
GGACGAGCAAGCCCCGTGGGTGGTGGCCAAGCAAGAAGGTGCGGACGCC  
GACCTGCAGGCCATCTGCTCGATGGGCATCAACCTGTTCCGCGTGCTGATG  
ACCTACCTGAAGCCGGTGTGCGAAGCTGACCGAGCGTGCCGAGGCCTT  
CCTGAACACCGAGCTGACCTGGGACGGCATCCAGCAGCCGCTGCTGGGCC  
ACAAGGTGAACCCGTTCAAGGCCCTGTACAACCGCATCGACATGCGCCAG  
GTCGAGGCCCTGGTGAAGCCTCGAAGGAAGAGGTGAAAGCCGCCGCCGC  
CCCGGTCACCGGTCCGTTGGCCGATGATCCGATCCAAGAAACCATCACCTT  
CGACGACTTCGCCAAGGTGGACCTGCGCGTGGCCCTGATCGAGAACGCCG  
AGTTCGTGCGAGGGCTCGGACAAGCTGCTGCGCCTGACCCTGGACCTGGGT  
GGCGAGAAGCGCAACGTGTTCTCGGGCATCCGCTCGGCCTACCCAGATCCG  
CAGGCCTTGATCGGTGCCACACCATCATGGTGGCCAACCTGGCCCCGCGT  
AAGATGCGCTTCGGCATCTCGGAGGGCATGGTGTGATGGCCGCCGGTCCGGGT  
GGCAAGGACATCTTCTGCTGTCGCCGGATGCCGGTGCCAAACCGGGTCAC  
CAGGTGAAGTGA

**Note: underlined nucleotides were changed following the Mycobacterial codon usage.**
